# Supplementary material
Source: PubMed Central journal article supplement (PMC2570888)
Supplement: M801646200_1.pdf [file M801646200_1.pdf]

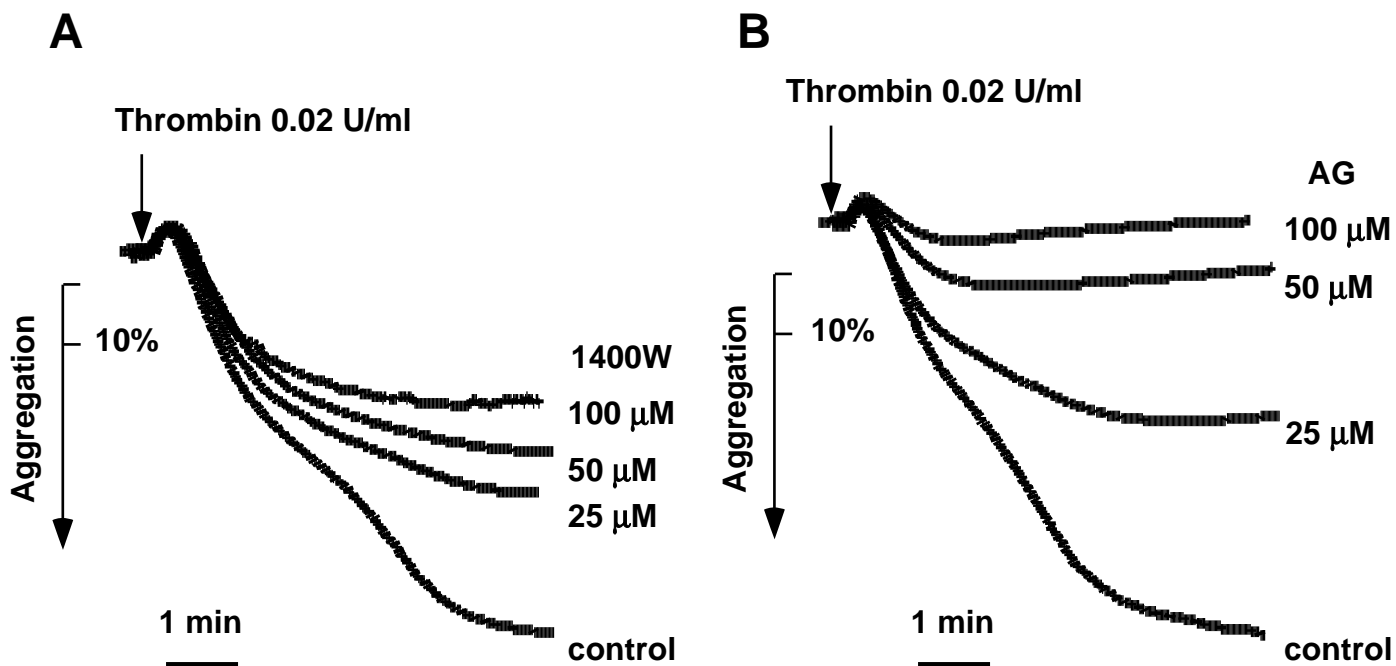

Supplemental Figure 1. Dose-dependent inhibition of platelet aggregation by iNOS-selective inhibitors. Washed human platelets were preincubated with indicated concentrations of iNOS inhibitors, 1400W (A) or aminoguanidine (AG) (B) for 5 minutes at 37°C and stimulated with 0.02 U/ml thrombin. Platelet aggregation was monitored in a platelet aggregometer as described under Experimental Procedures.
